# Supplementary material for: The efficacy of digital cognitive behavioral therapy for insomnia and depression: a systematic review and meta-analysis of randomized controlled trials
Source: PeerJ journal article supplement (doi:10.7717/peerj.16137), 2023-10-31

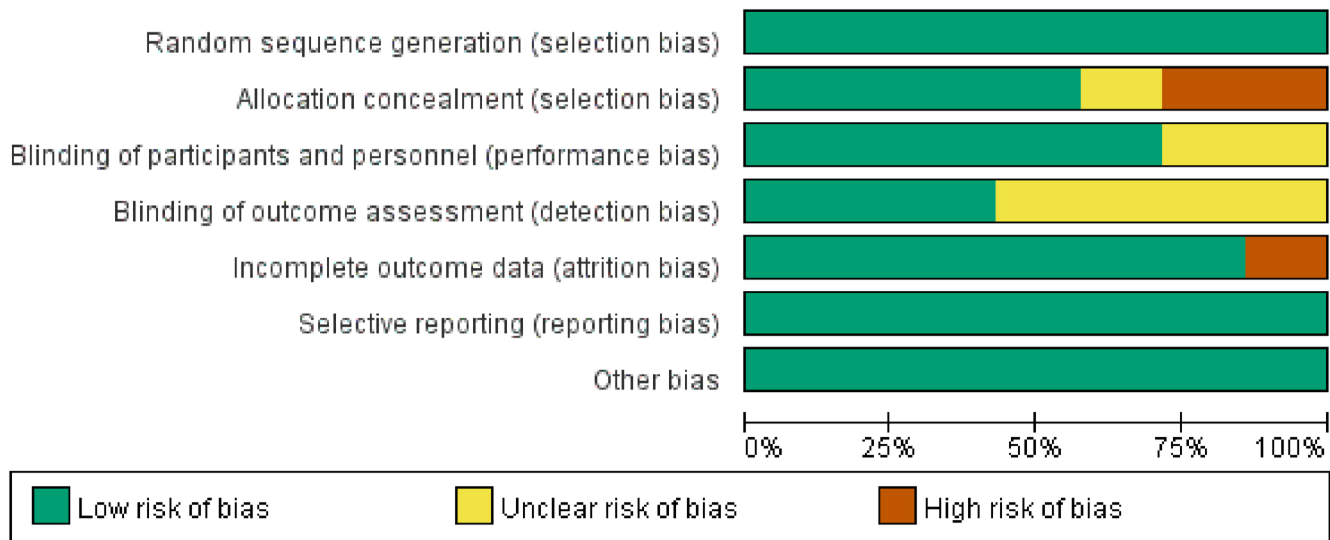

Supplement: FigS2_88032_JT_staff.pdf [file FigS2_88032_JT_staff.pdf]
